# Supplementary material for: Synthesis of vanillin via oxidation of kenaf stalks in the presence of CeO2: tuning the catalytic behaviour of CeO2via nanostructure morphology
Source: Royal Society of Chemistry journal article supplement (doi:10.1039/d4ra05833j), 2024-01-01

# Synthesis of Vanillin by Oxidation of Kenaf Stalks in the Presence of CeO<sub>2</sub>: Tuning of Catalytic Behaviour of CeO<sub>2</sub> via Nanostructures Morphology

Anita Ramli <sup>1,2,\*,+</sup>, Nur Akila Syakida Idayu Khairul Anuar <sup>1,2,+</sup>, Normawati Mohamad Yunus <sup>2,3,+</sup> and Alina Rahayu Mohamed <sup>4,+</sup>

<sup>1</sup>HICoE Centre of Biofuel and Biochemical Research, Institute of Self-Sustainable Building, Universiti Teknologi PETRONAS, Seri Iskandar 32610, Perak, Malaysia. Email: anita\_ramli@utp.edu.my, nurakila.khairul@utp.edu.my

<sup>2</sup>Fundamental and Applied Sciences Department, Universiti Teknologi PETRONAS, Seri Iskandar 32610 Perak, Malaysia. Email: anita\_ramli@utp.edu.my, nurakila.khairul@utp.edu.my, normaw@utp.edu.my

<sup>3</sup>Centre of Research in Ionic Liquids (CORIL), Institute of Contaminant Management for Oil and Gas, Department of Fundamental and Applied Sciences, Universiti Teknologi PETRONAS, Seri Iskandar 32610, Perak, Malaysia. Email: normaw@utp.edu.my

<sup>4</sup>Faculty of Chemical Engineering & Technology, UniMAP, Complex of Academics Jejawi 3, Jejawi, Arau 02600, Perlis, Malaysia. Email: alina@unimap.edu.my

\*Corresponding author: anita\_ramli@utp.edu.my, +605 3687639

## Supplementary Material

| No | Compound         | Retention time (min) | Area (%) |
|----|------------------|----------------------|----------|
| 1. | Coumaran         | 12.69                | 13.96    |
| 2. | 4-vinylguaiacol  | 14.25                | 4.37     |
| 3. | Syringol         | 14.87                | 11.52    |
| 4. | Vanillin         | 15.81                | 17.90    |
| 5. | 4-propylguaiacol | 16.69                | 7.29     |
| 6. | Syringaldehyde   | 19.76                | 27.97    |
| 7. | Glutaric acid    | 20.27                | 6.40     |
| 8. | Acetosyringone   | 20.72                | 10.60    |

**Table A1.** Details composition of degradation of wood products presence detected by GC-

MS

**Figure A1.** Full scan of Ce 3d core level X PS spectra of CeO<sub>2</sub> nanostructure catalyst.

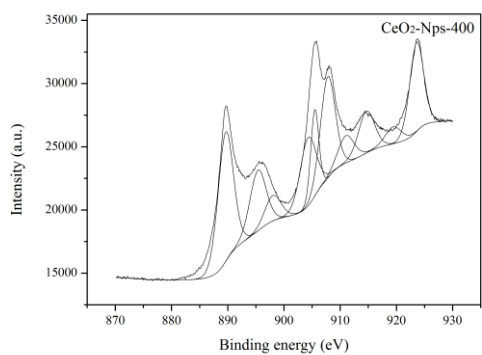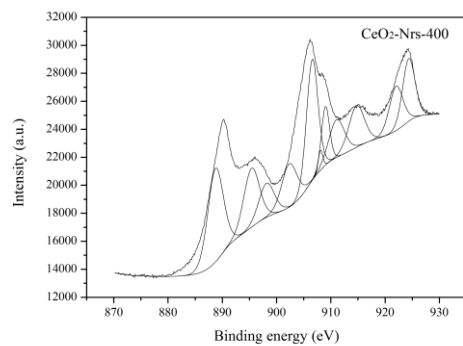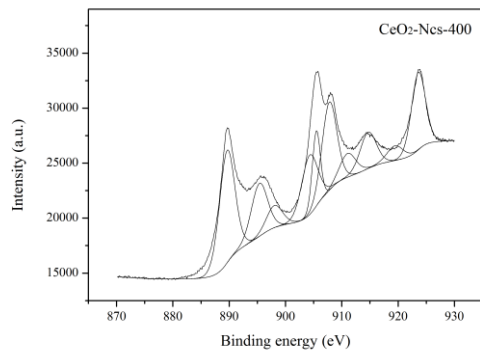

Supplement: d4ra05833j1.pdf [file d4ra05833j1.pdf]
